# Supplementary material for: Spectrin regulates Hippo signaling by modulating cortical actomyosin activity
Source: eLife journal article supplement (doi:10.7554/elife.06567), 2015-03-31
Supplement: supp [file elife-06567-supp-v1.zip]

Archive with 5 entries (5 files):
- elife_poa_e06567_Figure_1_figure_supplement_2.pdf
- elife_poa_e06567_Figure_2_figure_supplement_1.pdf
- elife_poa_e06567_Figure_2_figure_supplement_2.pdf
- elife_poa_e06567_Figure_1_figure_supplement_1.pdf
- elife_poa_e06567_Figure_5_figure_supplement_1.pdf
