# Supplementary figures and images for: Spectrin regulates Hippo signaling by modulating cortical actomyosin activity
Source: eLife journal article supplement (doi:10.7554/elife.06567), 2015-03-31

Figure 5-figure supplement 1

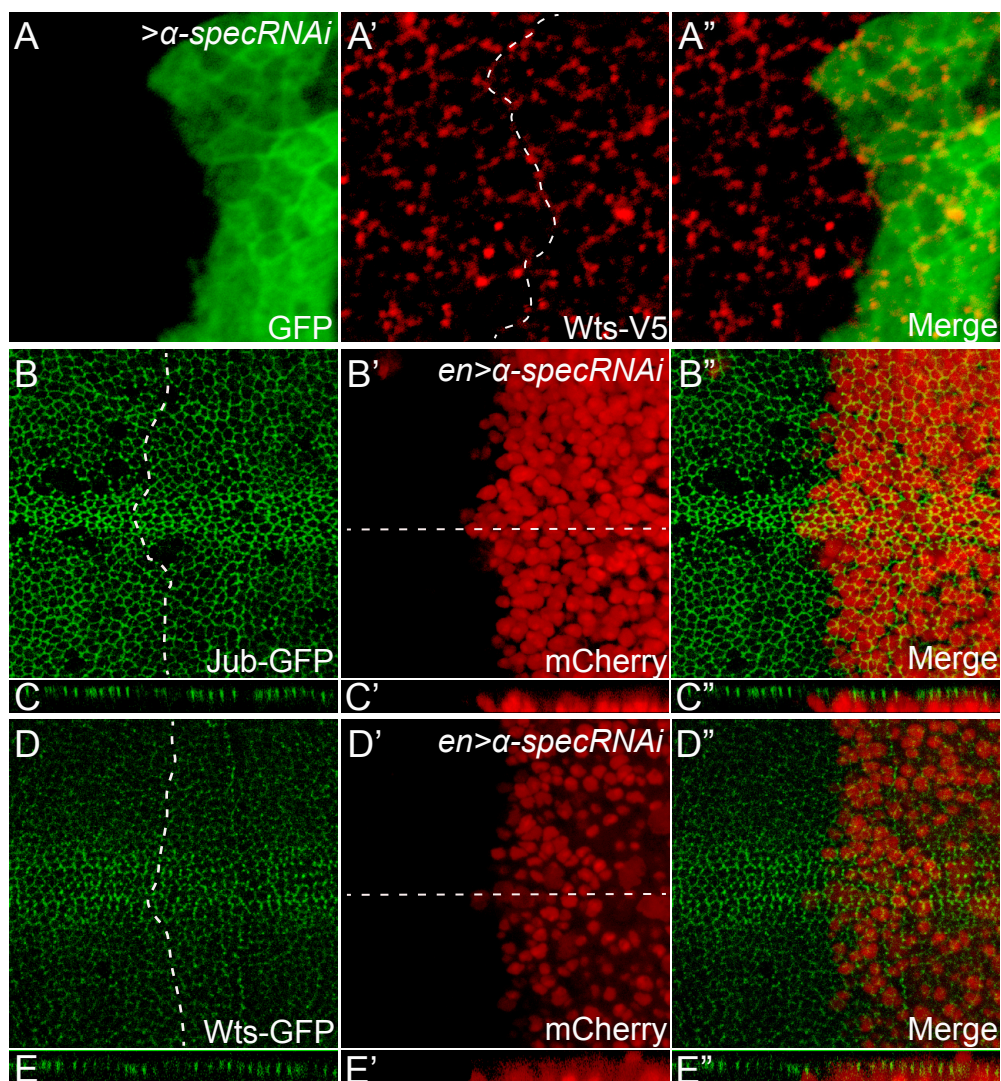

Supplement: supp [file elife-06567-supp-v1.zip]

Figure 2-figure supplement 2

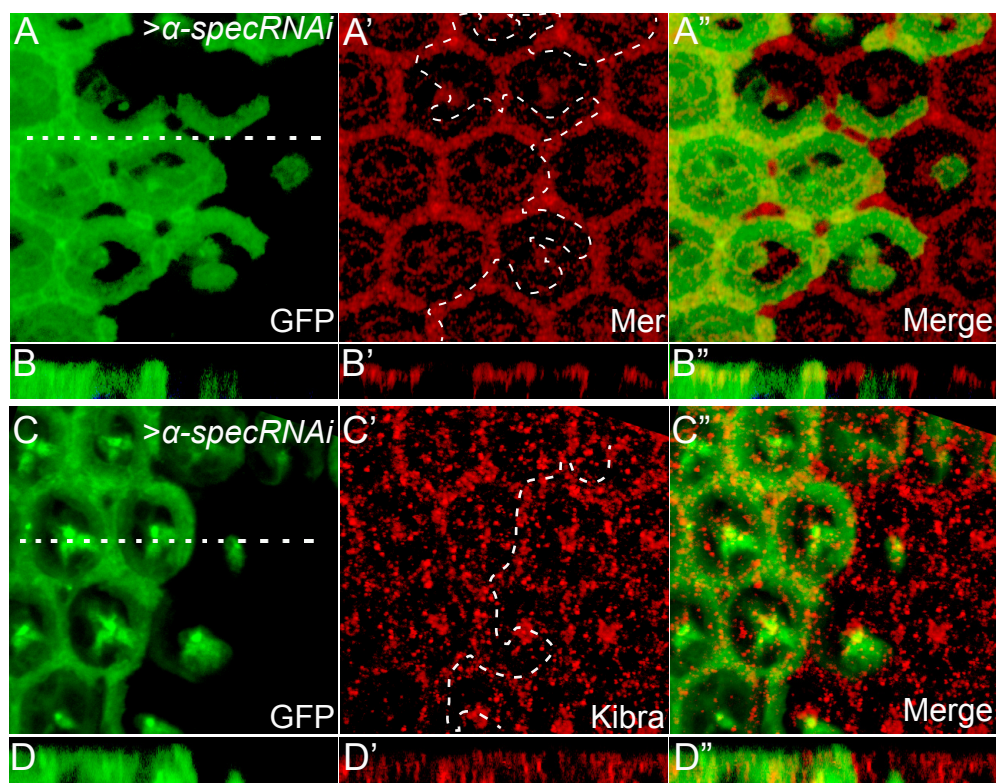

Supplement: supp [file elife-06567-supp-v1.zip]

Figure 1-figure supplement 2

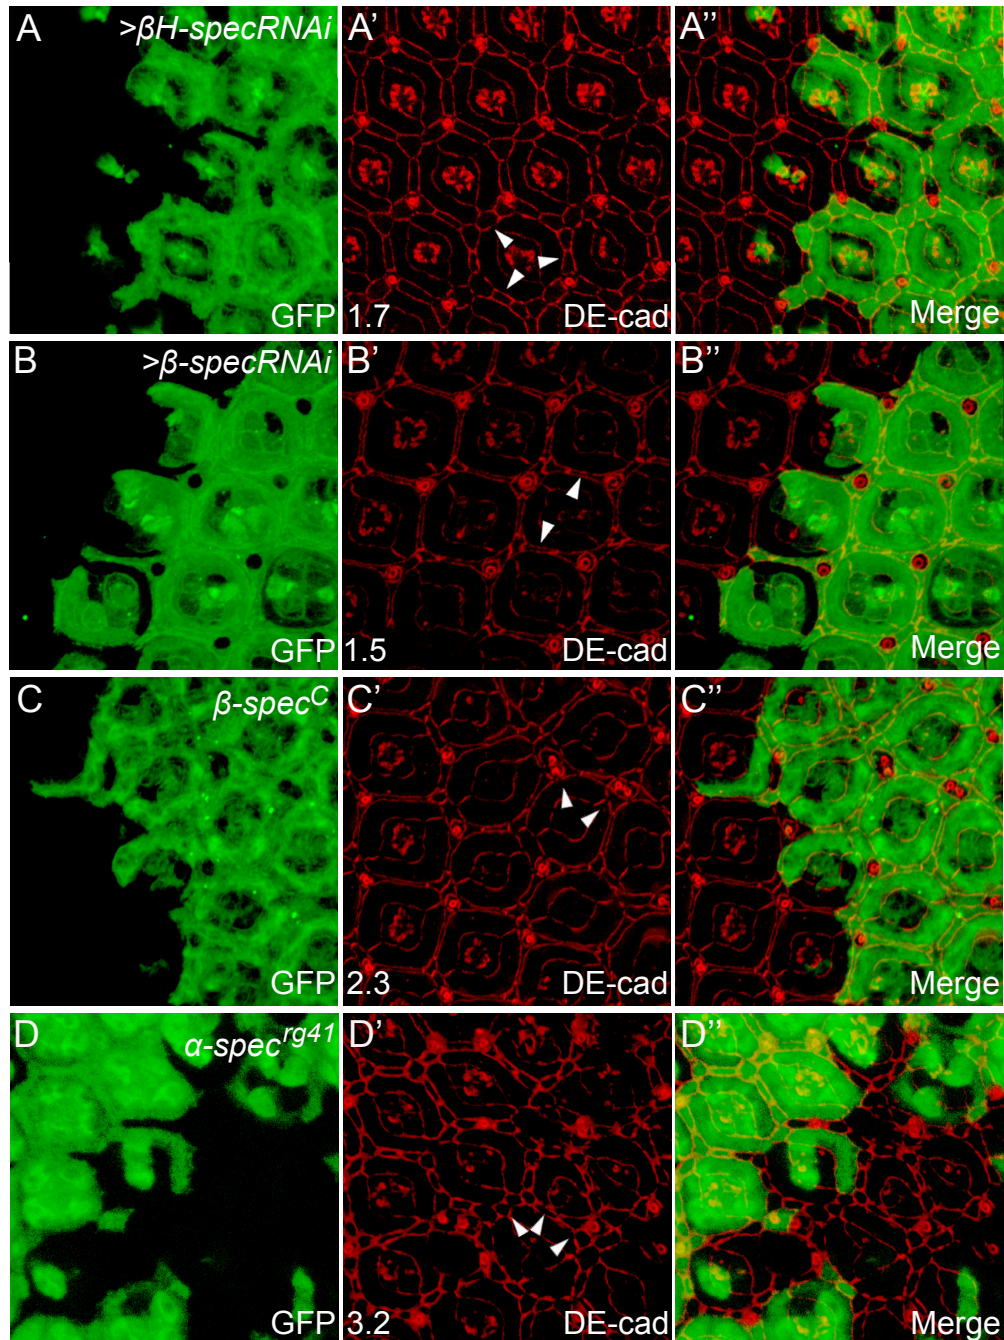

Supplement: supp [file elife-06567-supp-v1.zip › elife_poa_e06567_Figure_1_figure_supplement_2.pdf]

Figure 2-figure supplement 1

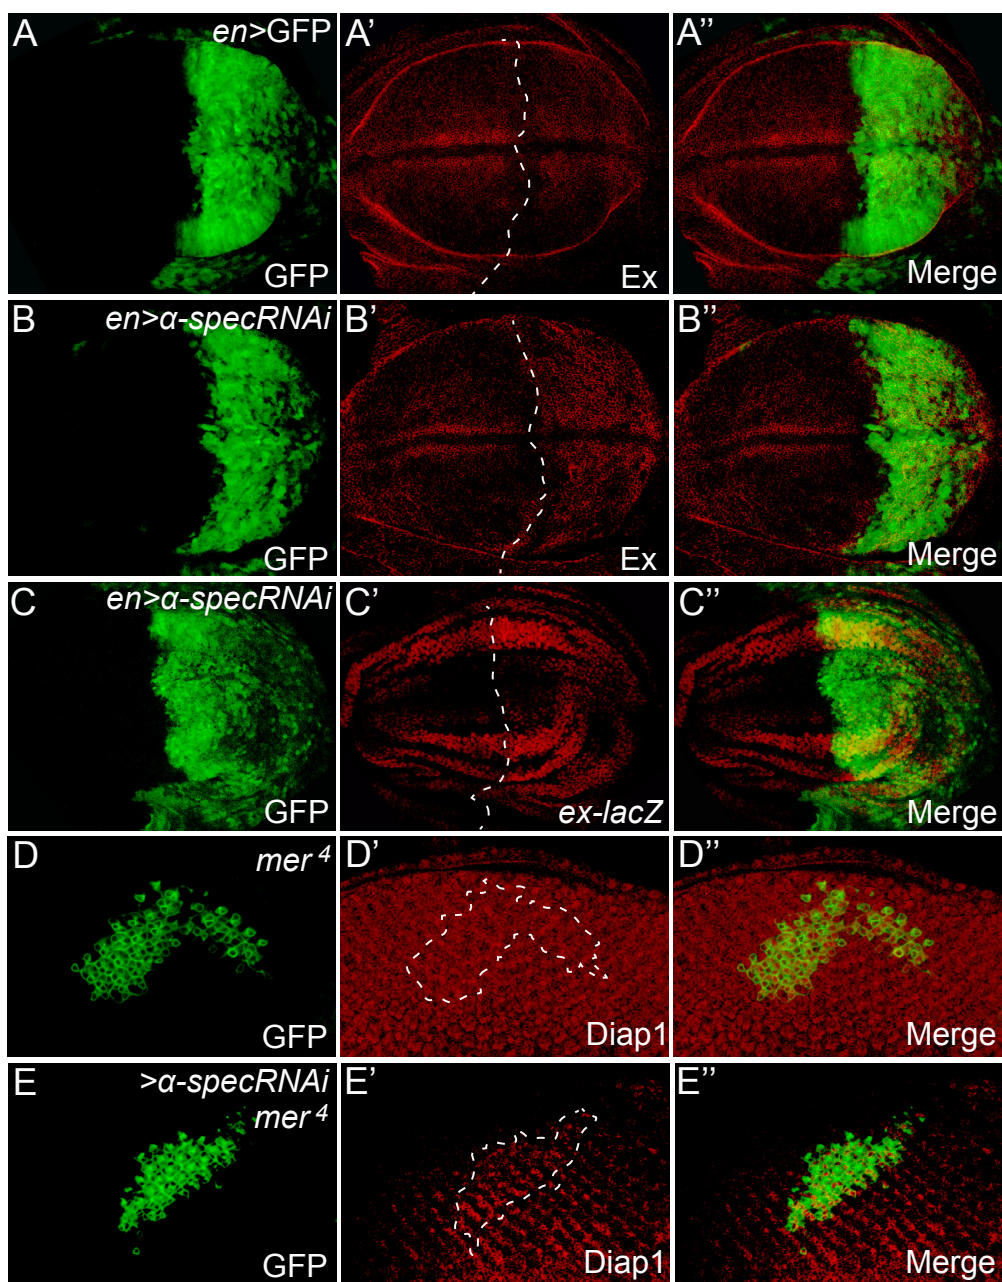

Supplement: supp [file elife-06567-supp-v1.zip › elife_poa_e06567_Figure_2_figure_supplement_1.pdf]

Figure 1-figure supplement 1

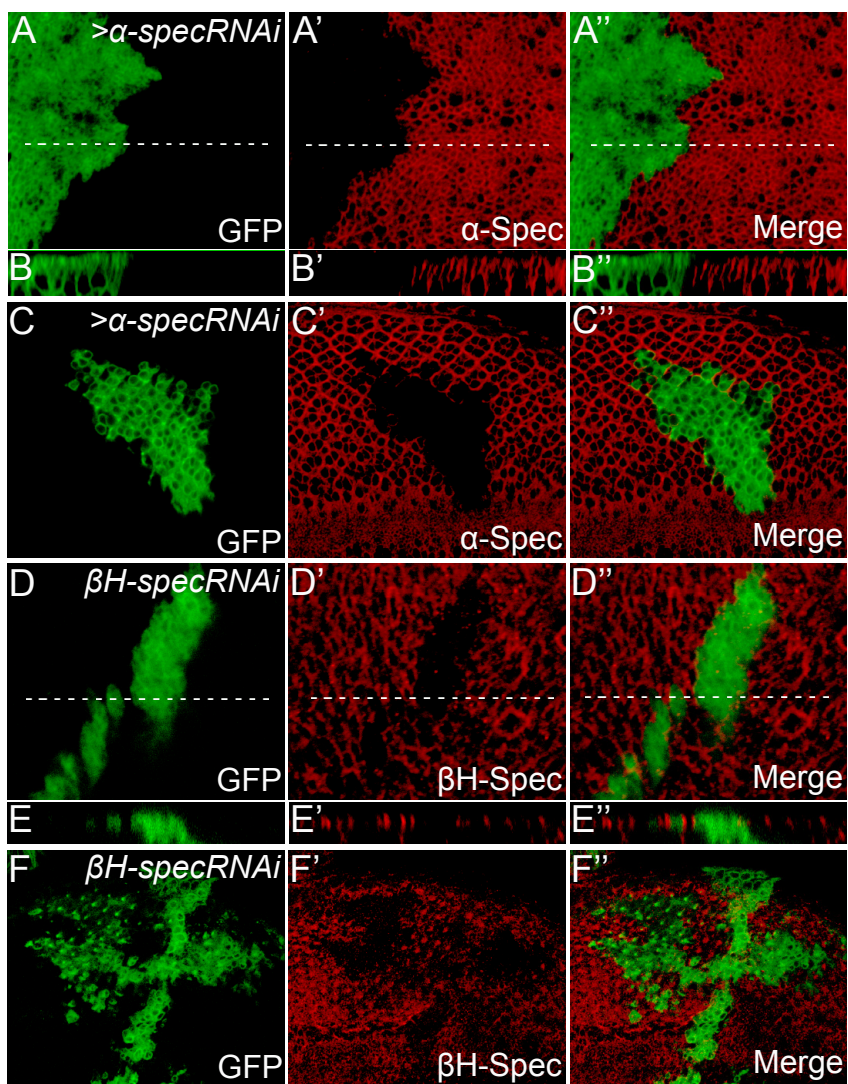

Supplement: supp [file elife-06567-supp-v1.zip › elife_poa_e06567_Figure_1_figure_supplement_1.pdf]
